# Supplementary material for: Efficacy and Safety of Immunotherapy for Cervical Cancer—A Systematic Review of Clinical Trials
Source: MDPI journal article supplement (doi:10.3390/cancers14020441), 2022-01-17
Supplement: s1 [file s1]

# Efficacy and Safety of Immunotherapy for Cervical Cancer—A Systematic Review of Clinical Trials

Mona W. Schmidt <sup>1,2,\*</sup>, Marco J. Battista <sup>1</sup>, Marcus Schmidt <sup>1</sup>, Monique Garcia <sup>2,3</sup>, Timo Siepmann <sup>2,4</sup>, Annette Hasenburg <sup>1</sup> and Katharina Anic <sup>1</sup>

<sup>1</sup> Department of Gynecology and Obstetrics, University Medical Centre Mainz, Langenbeckstraße 1, 55131 Mainz, Germany; marco.battista@unimedizin-mainz.de (M.J.B.); marcus.schmidt@unimedizin-mainz.de (M.S.); annette.hasenburg@unimedizin-mainz.de (A.H.); katharina.anic@unimedizin-mainz.de (K.A.)

<sup>2</sup> Division of Health Care Sciences Center for Clinical Research and Management Education Dresden, Dresden International University, 01067 Dresden, Germany; med.moniquegarcia@gmail.com (M.G.); timo.siepmann@uniklinikum-dresden.de (T.S.)

<sup>3</sup> Department of Medicine, Pontificia Universidade Católica de Minas Gerais (PUC MG), 32604-115 Betim, Brazil

<sup>4</sup> Department of Neurology, University Hospital Carl Gustav Carus, Technische Universität Dresden, 01307 Dresden, Germany

\* Correspondence: mona.schmidt@unimedizin-mainz.de; Tel.: +49-6131-17-0

## Appendix A

### Search strategies\_

#### Ovid (Medline)

1. Immunotherapy/ or exp Antineoplastic Agents, Immunological/ or exp Antibodies, Monoclonal, Humanized/ or Immunization/ or Immunotherapy, adoptive/ or Immunotherapy, Active/ or Receptors, Chimeric Antigen/ or Lymphocytes, Tumor-Infiltrating/ or immune checkpoint inhibitors/ or (immunotherap\* or immuni#ation\* or vaccine-therap\* or rna-manipulation\* or ((monoclonal or immunological) adj3 antibod\* adj3 antineoplastic\*) or (Adalimumab or Alemtuzumab or Basiliximab or Certolizumab Pegol or Daclizumab or Ipilimumab or Natalizumab or Nivolumab or Omalizumab or Palivizumab or Ustekinumab or Pembrolizumab or Atezolizumab) or ((checkpoint or pd-1 or pd-l1 or programmed or ctla-4 or cytotoxic-t-lymphocyte) adj3 inhibit\*) or ((Tumor or tumour) adj3 (infiltrating or derived) adj3 (cell or lymphocyte\*)) or ((chimeric or t-cell) adj3 (receptor\* or immunoreceptor\*)) or (car-t-cell adj3 therap\*).ab,ti.
2. exp uterine cervical neoplasms/ or (cervi\* adj3 (cancer\* or carcinom\* or neoplas\*)).ab,ti.
3. 1 and 2

#### Web of Science

4. TS=(immunotherap\* OR immune?ation\* OR vaccine-therap\* OR rna-manipulation\* )
5. TS=(((monoclonal OR immunological) NEAR/3 (antibod\*)) NEAR/3 (antineoplastic\*))
6. TS=(Adalimumab or Alemtuzumab or Basiliximab or Certolizumab Pegol or Daclizumab or Ipilimumab or Natalizumab or Nivolumab or Omalizumab or Palivizumab or Ustekinumab or Pembrolizumab or Atezolizumab)
7. TS=((checkpoint OR pd-1 OR pd-l1 OR programmed OR ctla-4 OR cytotoxic-t-lymphocyte) NEAR/3 (inhibit\*))
8. TS=((Tumor OR tumour) NEAR/3 (infiltrating OR derived) NEAR/3 (cell OR lymphocyte\*))
9. TS=(((chimeric OR t-cell) NEAR/3 (receptor\* OR immunoreceptor\*)) OR ((car-t-cell) NEAR/3 (therap\*)))
10. TS=((cervi\*) NEAR/3 (cancer\* OR carcinom\* OR neoplas\*))
11. ((((((#1) OR #2) OR #3) OR #4) OR #5) OR #6
12. (#8) AND #7

13. MeSH descriptor: [Immunotherapy] this term only
14. MeSH descriptor: [Antineoplastic Agents, Immunological] explode all trees
15. MeSH descriptor: [Antibodies, Monoclonal, Humanized] explode all trees
16. MeSH descriptor: [Immunization] this term only
17. MeSH descriptor: [Immunotherapy, Adoptive] this term only
18. MeSH descriptor: [Immunotherapy, Active] this term only
19. MeSH descriptor: [Receptors, Chimeric Antigen] this term only
20. MeSH descriptor: [Lymphocytes, Tumor-Infiltrating] this term only
21. MeSH descriptor: [Immune Checkpoint Inhibitors] this term only
22. (immunotherap\*):ti,ab,kw
23. (immuni?ation\*):ti,ab,kw
24. (vaccine-therap\*):ti,ab,kw
25. (rna-manipulation\*):ti,ab,kw
26. ((monoclonal OR immunological) NEAR/3 antibod\* NEAR/3 antineoplastic\*):ti,ab,kw
27. (Adalimumab or Alemtuzumab or Basiliximab or Certolizumab Pegol or Daclizumab or Ipilimumab or Natalizumab or Nivolumab or Omalizumab or Palivizumab or Ustekinumab or Pembrolizumab or Atezolizumab):ti,ab,kw
28. ((checkpoint OR pd-1 OR pd-l1 OR programmed OR ctla-4 OR cytotoxic-t-lymphocyte) NEAR/3 inhibit\*):ti,ab,kw
29. ((Tumor OR tumour) NEAR/3 (infiltrating OR derived) NEAR/3 cell OR lymphocyte\*):ti,ab,kw
30. ((chimeric OR t-cell) NEAR/3 (receptor\* OR immunoreceptor\*)):ti,ab,kw
31. (car-t-cell NEAR/3 therap\*):ti,ab,kw
- 32.
33. MeSH descriptor: [Uterine Cervical Neoplasms] explode all trees
34. (cervi\* NEAR/3 (cancer\* OR carcinom\* OR neoplas\*)):ti,ab,kw
35. {OR #21-#22}
36. #20 AND #23

**Table S1.** Overview of unspecific immunomodulating therapies. An overview of unspecific immunomodulating therapies can be found in table S3. However, this cannot be regarded a complete display of existing clinical data on unspecific immunomodulating therapies.

| Study/<br>Author/<br>Year        | Type                       | Concurrent<br>treatment | Study phase | Number of<br>cervical cancer<br>patients<br>(all patients) | Stage of<br>cervical cancer                              | Treatment                | Survival<br>outcomes | Response rates          | Most common<br>adverse events                                                                                           |
|----------------------------------|----------------------------|-------------------------|-------------|------------------------------------------------------------|----------------------------------------------------------|--------------------------|----------------------|-------------------------|-------------------------------------------------------------------------------------------------------------------------|
| Wadler<br>et al.<br>1995<br>[74] | Interferon<br>$\alpha$ -2b | Prior CHT<br>allowed    | II          | 31                                                         | Refractory to<br>conventional<br>treatment<br>Stage I-IV | s.c. 3 times<br>per week | OS= 4.5              | ORR=: 10%<br>DCR= 32.3% | No TRD, hematologic<br>toxicities, fevers,<br>chills, fatigue<br>infection,<br>nausea/vomiting,<br>diarrhea, mucositis, |

|                                  |                                                                       |                                       |    |    |                                |                                                                                                      |                                                                                                                          |                                               |                                                                                                                                                                                  |
|----------------------------------|-----------------------------------------------------------------------|---------------------------------------|----|----|--------------------------------|------------------------------------------------------------------------------------------------------|--------------------------------------------------------------------------------------------------------------------------|-----------------------------------------------|----------------------------------------------------------------------------------------------------------------------------------------------------------------------------------|
|                                  |                                                                       |                                       |    |    |                                |                                                                                                      |                                                                                                                          |                                               | neurotoxicity, hepatic/pulmonary toxicities, thrombosis                                                                                                                          |
| Wadler et al. 1997 [75]          | Interferon $\alpha$ + all-trans retinoic acid                         | -                                     | II | 26 | R/M (pretreated)               | interferon s.c. 3 times per week + all-trans retinoic acid 3 times per day (continuously or day1-3)  | OS= 150 days [81-258]                                                                                                    | ORR= 0%<br>DCR= 34.6%                         | No TRD, fatigue, anorexia, fevers, chills, dizziness, headache, nausea, dermatologic toxicities (especially xerosis), mild elevation of liver enzymes, mild respiratory symptoms |
| Wilailak et al. 2003 [76]        | Interferon $\alpha$ -2a 3 MU + 13-cis-retinoic acid                   | CHT (cisplatin + 5-fluorouracil) + RT | I  | 8  | First line Stage IIIB          | RT + CHT q1w + interferon s.c. 3 times per week + 13-cis-retinoic acid daily p.o. for 12 weeks       | 75% alive with CR at 12-48 months (median 24 months), 25% alive with locoregional or distant disease at 18 and 30 months | CRR= 100%                                     | No TRD, hematologic toxicities, nausea/vomiting, elevated liver enzymes, fever, flue-like syndrome, mucositis, diarrhea, peripheral neuropathy                                   |
| Look et al. 1998 [77]            | Interferon $\alpha$ -A2 + isotretinoin                                | Prior CHT or RT                       | II | 34 | R (unresectable)               | Daily isotretinoin p.o. + daily interferon $\alpha$ -A2 s.c. for 4 weeks per course                  | PFS in 3 patients with SD 2.8-4.6 months                                                                                 | ORR= 3.8% [0.1-19.6]<br>3 patients with SD    | No TRD, grade 3/4 AE with hematological toxicities, nausea/vomiting, elevation of liver enzymes or creatinine, neurological symptoms                                             |
| Braud et al. 2002 [78]           | Interferon $\alpha$ + all-trans retinoic acid or 12-cis retinoic acid | CHT (Cisplatin)                       | II | 33 | R/M, (pretreated)              |                                                                                                      |                                                                                                                          |                                               |                                                                                                                                                                                  |
| Lippman et al. 1992 [79]         | Interferon $\alpha$ -2A plus 13-cis-retinoic acid                     |                                       | II | 26 | First line Locally advanced    | Daily s.c. interferon $\alpha$ -2a + daily oral 13-cis retinoic acid                                 | Not reported                                                                                                             | ORR= 50%<br>DCR= 84.6%                        | No TRD, dermatitis, conjunctivitiy, fatigue, hypertryglyceridemia                                                                                                                |
| Duenas-Gonzalez et al. 2002 [80] | Leukocyte Interferon $\gamma$ + cytokines (IRX-2)                     | Surgery (+ adjuvant RT)               | I  | 10 | First line IB1-IIA             | Neoadjuvant IRX-2, Daily injection of IRX-2 for 10 days + surgery 21d post IRX-2 (+ RT if indicated) | 80% disease free at 29-31 months, 1 recurrence at 27 months                                                              | Response evaluated during surgery<br>ORR= 50% | No TRD, no AE attributed to cytokine treatment                                                                                                                                   |
| Wadler et al. 2004 [81]          | Interleukin-12                                                        |                                       | II | 34 | M/R or inoperable (pretreated) | IL-12 i.v. daily for 5 days q3w                                                                      | OS= 6.5 [5.8-11.5]                                                                                                       | ORR= 3%<br>DCR= 23%                           | No TRD, hematologic and hepatic toxicities, fever, infection, neurological toxicities, edema, arthralgia/myalgia, fatigue, stomatitis, nausea/vomiting,                          |

|                                 |                                                         |                                        |           |          |                                      |                                                                                                                                                               |                                                                                                                                                          |                                                             |                                                                                                                                                                                     | pulmonary and cardiac toxicities |
|---------------------------------|---------------------------------------------------------|----------------------------------------|-----------|----------|--------------------------------------|---------------------------------------------------------------------------------------------------------------------------------------------------------------|----------------------------------------------------------------------------------------------------------------------------------------------------------|-------------------------------------------------------------|-------------------------------------------------------------------------------------------------------------------------------------------------------------------------------------|----------------------------------|
| Cappello et al.<br>1984<br>[82] | BCG                                                     | Surgery                                | I         | 45       | First line therapy<br>Stage I and II | BCG injections into the portio 21 days prior to surgery<br>RT ± C. parvum<br>4mg/m <sup>2</sup> day 5 and 10 post surgery, then q2w (q4w for 1 year after RT) | Not reported                                                                                                                                             | Not reported                                                | No <i>TRD</i> , few slightly enlarged lymphnodes                                                                                                                                    |                                  |
| DiSaia et al.<br>1986<br>[83]   | Corynebacterium parvum                                  | RT                                     | III (RCT) | 28       | First line therapy<br>Stage IIB-IVA  | Neoadjuvant C. parvum injections 10 days prior to surgery                                                                                                     | Relapse rate localized tumors:<br>5% (C. parvum) vs 29% (control);<br>p<0.05                                                                             | Not reported                                                | Related to C. parvum injections:<br>No <i>TRD</i> , chills, fever, lymphopenia, malaise, diarrhea, nausea/vomiting                                                                  |                                  |
| Mignot et al.<br>1981<br>[84]   | Corynebacterium parvum                                  | Surgery (+ adjuvant RT)                | RCT       | 58       | First line therapy                   | Relapse free interval<br>13 months ±6.1 (C. parvum) vs 6.5 ±3.9 months (control)                                                                              | Not reported                                                                                                                                             | No <i>TRD</i> , minor <i>AE</i> including discomfort, fever |                                                                                                                                                                                     |                                  |
| Gall et al.<br>1978*<br>[85]    | Corynebacterium parvum                                  | RT                                     | I         | 8 (53)   | Stage III                            | RT ± Corynebacterium parvum<br>4mg/m <sup>2</sup> day 5 and 10 post surgery, then q2w (q4w for 1 year after RT)                                               | Not reported                                                                                                                                             | Not reported                                                | Overall cohort:<br>No <i>TRD</i> , chills, fever, short-term hypo/hypertension, nausea/vomiting, malaise, diarrhea, minor chest pain, headaches, apprehension, cyanosis, leg cramps |                                  |
| Ahn et al.<br>2004*<br>[86]     | Agaricus blazei Murill Kyowa (ABMK) (mushroom abstract) | CHT (carboplatin + etoposide or taxol) | I (RCT)   | 61 (100) | First line therapy                   | CHT q3w+ daily p.o. ABMK or placebo                                                                                                                           | Not reported                                                                                                                                             | Not reported                                                | Improvement of overall physical and emotional conditions                                                                                                                            |                                  |
| Kikkawa et al.<br>1993<br>[87]  | OK-432 Streptococcal preparation)                       | Surgery ± RT                           | II (RCT)  | 177      | First line Ib and II                 | Surgery + RT if indicated ± i.d. OK-432<br>q2d for 5 increasing doses, then q2w for up to 2 years                                                             | OS= No significant difference between groups<br>5y disease free rate= 89% OK-432 group vs 94% control<br>5y disease free rate for stage II patients= 89% | Not reported                                                | Not reported                                                                                                                                                                        |                                  |

|                                     |                                                  |                                           |                  |         |                                                                  |                                                                                                                              |                                                                                                                                                                                             |              |                                                         |
|-------------------------------------|--------------------------------------------------|-------------------------------------------|------------------|---------|------------------------------------------------------------------|------------------------------------------------------------------------------------------------------------------------------|---------------------------------------------------------------------------------------------------------------------------------------------------------------------------------------------|--------------|---------------------------------------------------------|
|                                     |                                                  |                                           |                  |         |                                                                  |                                                                                                                              | OK-432 group<br>vs. 68% control<br>group (p>0.05)                                                                                                                                           |              |                                                         |
|                                     |                                                  |                                           |                  |         |                                                                  |                                                                                                                              | Stage II cancer=<br>60m recurrence<br>free rates: 68.6%<br>(OK-432) vs 50.7<br>(control) p<0.05<br>60m survival<br>rate= 72.4%<br>(OK-432) vs<br>56.5% (p=0.07)                             |              |                                                         |
| Noda et<br>al.<br>1989<br>[88]      | OK-432<br>(streptoco<br>ccal<br>preparatio<br>n) | RT<br>(±surgery)                          | II/III?<br>(RCT) | 382     | First line<br>I-IV                                               | RT ± surgery<br>± i.d. OK-432<br>q2d for 5<br>increasing<br>doses, then<br>q2w for up to<br>2 years                          | Stage III cancer<br>60m recurrence<br>free rates= 36-<br>7% (OK-432) vs<br>35.6% (control)<br>(p<0.05)<br>60m survival<br>rates= 44.7 (OK-<br>432) vs 40.2%<br>(control) p>0.05             | Not reported | Not reported                                            |
|                                     |                                                  |                                           |                  |         |                                                                  |                                                                                                                              | Sig. prolonged<br>survival time in<br>patients<br>undergoing<br>surgery for<br>stage II cancer<br>with OK-432                                                                               |              |                                                         |
| Okamura<br>et al.<br>1989<br>[89]   | OK-432<br>(streptoco<br>ccal<br>preparatio<br>n) | Unclear                                   | (RCT)            | 387     | Primary cervical<br>cancer, stratified<br>by previous<br>surgery | OK-432 vs<br>unknown<br>control<br>treatment                                                                                 | <b>Recurrence free<br/>rates=</b> 12m<br>84.7% (OK-432)<br>vs 4.7%(control)<br>24m= 75.9% vs<br>71.8%<br>36m= 71.9% vs<br>58.6% (p<0.05)<br>Difference not<br>sig. in stage III<br>subgroup | Not reported | Not reported                                            |
| Kucera<br>et al.<br>1982<br>[90]    | Vitamin A                                        | RT                                        | I/II<br>(RCT)    | 42      | First line<br>Inoperable stage<br>III                            | RT ± vitamin<br>A palmitate<br>p.o.5<br>days/week<br>during the<br>first 4 weeks<br>of RT                                    | <b>1yPFS=</b> 76.2%<br>(vitamin A<br>group) vs 61.2%                                                                                                                                        | Not reported | Vitamin A related <b>AE</b> :<br>dermatitis, stomatitis |
| Mallmann<br>et al.<br>1989*<br>[91] | Thymopentin                                      | Surgery or<br>RT<br>depending<br>on stage |                  | 34 (74) | First line<br>Stage I-IV                                         | Surgery or RT<br>depending on<br>stage ±<br>thymopentin<br>100mg/die for<br>2 weeks, then<br>100mg<br>3x/week for 4<br>weeks | Cervical<br>carcinoma:<br>reported only in<br>graphs, no<br>statistical<br>analysis<br>performed,<br>graphically no<br>great differences                                                    | Not reported | Not reported                                            |

|                                 |                                                                           |                            |              |     |                             |                                                                                                      |                                                                                                                                                                                                                                                                                                       |                                                                                                                                  |                                                                                                                                                                                                                                                                  |
|---------------------------------|---------------------------------------------------------------------------|----------------------------|--------------|-----|-----------------------------|------------------------------------------------------------------------------------------------------|-------------------------------------------------------------------------------------------------------------------------------------------------------------------------------------------------------------------------------------------------------------------------------------------------------|----------------------------------------------------------------------------------------------------------------------------------|------------------------------------------------------------------------------------------------------------------------------------------------------------------------------------------------------------------------------------------------------------------|
| Noda et al.<br>1992<br>[92]     | Sizofiran                                                                 | RT                         | II?<br>(RCT) | 292 | First line<br>Stage II-III  | RT± i.m.<br>sizofiran<br>40mg initially,<br>then<br>20mg/week<br>until 1 week<br>post RT             | Not reported                                                                                                                                                                                                                                                                                          | <b>CRR</b> = 83%<br>(77.5-88.5;<br>sizofiran) vs<br>69.6% (59.6-<br>79.5; control),<br>p<0.05                                    | No <b>TRD</b> , no <b>SAE</b> , mild<br>injection site reactions,<br>rash, nausea/vomiting,<br>increased liver<br>enzymes                                                                                                                                        |
| Okamura et al.<br>1989<br>[89]  | Sizofiran                                                                 | RT                         | RCT          |     | First line,<br>Stage II-III | RT± i.m.<br>sizofiran<br>40mg once or<br>twice per<br>week                                           | Reported as<br>graphs,<br>Sig. longer time<br>to recurrence<br>overall as well<br>as stage II<br>patients, not in<br>stage III with<br>sizofiran<br><br>6 months<br>survival curves<br>sig different<br>overall and in<br>stage II patients<br>with sizofiran                                         | Not reported                                                                                                                     | Not reported                                                                                                                                                                                                                                                     |
| Noda et al.<br>2006A<br>[93]    | Z-100<br>(extract of<br>mycobacterium<br>tuberculosis strain<br>Aoyama B) | RT                         | II<br>(RCT)  | 116 | First line<br>Stage IIIB    | RT+ s.c. Z-100<br>twice per<br>week during<br>RT followed<br>by q1w<br>(3 different<br>doses tested) | <b>5y OS</b> =<br>40µg: 47.4%<br>[30.6-64.2]<br>20µg: 59.6%<br>[43.8-75.4%]<br>2µg: 59.2% [42.7-<br>75.7]<br>P=0.598                                                                                                                                                                                  | <b>ORR</b> = 83.6%<br><br><b>ORR</b> at 40µg=<br>94.3%<br><b>ORR</b> at 20µg=<br>84.6%<br><b>ORR</b> at 2µg=<br>72.2%<br>P=0.006 | No <b>TRD</b> , no <b>SAE</b> ;<br>fever, injection site<br>reactions, rash,<br>elevated liver<br>enzymes, headache                                                                                                                                              |
| Noda et al.<br>2006B<br>[94]    | Z-100<br>(extract of<br>mycobacterium<br>tuberculosis strain<br>Aoyama B) | RT (+ CHT<br>if indicated) | III<br>(RCT) | 221 | First line<br>Stage IIIB    | RT+ s.c. Z-100<br>twice per<br>week during<br>RT followed<br>by q2w<br>(2 different<br>doses tested) | <b>PFS</b> =<br>0.2µg: 80<br>months [39-NR]<br>40µg: 30 months<br>[19-not<br>reported]<br><b>OS</b> =<br>0.2µg NR [57-<br>NR]<br>40µg: 44 months<br>[38-62], p<0.05<br><br><b>5y OS</b> =<br>0.2µg: 58.2%<br>[48.7-67.7]<br>40µg: 41.5%<br>[31.7-51.3],<br>p<0.05<br><b>HR</b> = 0.67 [0.46-<br>0.98] | <b>ORR</b> =<br>0.2µg: 93.5%<br>40µg: 91.5%,<br>p>0.05                                                                           | No <b>TRD</b> , no sig.<br>differences between<br>grade 3/4 <b>AE</b> both<br>groups, musculo-<br>skeletal disorders,<br>gastrointestinal<br>disorders, urinary<br>system disorders,<br>general disorders,<br>respiratory issues,<br>cardiovascular<br>disorders |
| Sugiyama et al.<br>2014<br>[95] | Z-100<br>(extract of<br>mycobacterium<br>tuberculosis strain              | RT (+CHT<br>if indicated)  | III<br>(RCT) | 249 | First line<br>Stage IIB-IVA | RT + Z-100<br>0.2µg vs<br>placebo twice<br>per week<br>during RT,<br>then q2w                        | Trial stopped<br>prematurely due<br>to high survival<br>rates                                                                                                                                                                                                                                         | <b>ORR</b> = 99% (Z-<br>100) vs 99%<br>(placebo),<br><b>CRR</b> = 68.3%<br>(Z-100) vs<br>54.5% (placebo)                         | No <b>TRD</b> , similar <b>AE</b><br>between both groups,<br>leukopenia higher in<br>placebo group,<br>constipation/diarrhea,<br>nauseas/vomiting,                                                                                                               |

|                                 |                                               |    |              |     |                                |                                                                                             |                                                                                                                      |                                                                                           |                                                                                                                                         |
|---------------------------------|-----------------------------------------------|----|--------------|-----|--------------------------------|---------------------------------------------------------------------------------------------|----------------------------------------------------------------------------------------------------------------------|-------------------------------------------------------------------------------------------|-----------------------------------------------------------------------------------------------------------------------------------------|
| Aoyama<br>B)                    |                                               |    |              |     |                                |                                                                                             | 5yOS= 75.7% (Z-100) vs 65.8%,<br>p=0.07<br>OS in stage III patients sign. prolonged with Z-100 (HR 0.51 [0.28-0.94]) |                                                                                           | dermatitis, cystitis, headache, anorexia, fatigue, radiation-associated pain, anemia                                                    |
|                                 |                                               |    |              |     |                                |                                                                                             |                                                                                                                      | ORR= 100% in both groups post RT, sig. quicker response in LC9018 group                   |                                                                                                                                         |
| Okawa<br>et al.<br>1989<br>[96] | LC9018<br>(prepared from Lactobacillus casei) | RT | II<br>(RCT)  | 61  | First line<br>Stage IIB or III | RT± i.d. or s.c. LC9018 once or twice per week                                              | 3yOS= 73.1% (LC9018) vs 60.9% (control), p>0.05                                                                      | CR= 69.2% (LC9018) vs 56.5% (control), p>0.05                                             | No TRD, fever, local injection site reactions, anorexia, diarrhea                                                                       |
|                                 |                                               |    |              |     |                                |                                                                                             |                                                                                                                      | CR by administration route:<br>88.2% (i.d.) vs 33.3% (s.c.),<br>p<0.05                    |                                                                                                                                         |
|                                 |                                               |    |              |     |                                |                                                                                             | 4y recurrence rate=                                                                                                  |                                                                                           |                                                                                                                                         |
| Okawa<br>et al.<br>1993<br>[97] | LC9018<br>(Prepared from Lactobacillus casei) | RT | III<br>(RCT) | 213 | First line<br>Stage IIIB       | RT± i.d. LC9018 once or twice per week during RT, then once per week or month for two years | 33.5% (LC9018) vs 51.5% (control), p<0.05<br>4yOS= 69.2% (LC9018) vs 46.2% (control), p<0.05                         | ORR= 92.6% (LC9018) vs 89.7% (control), p=0.094<br>CRR= 53.7% (LC9018) vs 42.1% (control) | Injection site reaction, mild fever (LC9018), diarrhea, anorexia, less neutropenia in the LC9018 group, liver enzyme elevations, anemia |

AE: Adverse events; CHT: chemotherapy; CRR: complete response rate; DCR: disease control rate; HR= hazard ratio, i.d.: intra-dermally; i.v.: intravenously; ORR: objective response rate; OS: overall survival; p.o.: per os; PFS: progression-free survival; RCT: randomized controlled trial; RT= radiotherapy, s.c.: subcutaneously; SAE: serious adverse events; TRD: treatment-related deaths, Xy OS: X-year overall survival

|                         | Risk of bias domains |    |    |    |    |         |
|-------------------------|----------------------|----|----|----|----|---------|
|                         | D1                   | D2 | D3 | D4 | D5 | Overall |
| Study                   |                      |    |    |    |    |         |
| Basu et al. 2018        | ⊖                    | ⊕  | ⊗  | ⊕  | ⊕  | ⊗       |
| Chen et al. 2015        | ⊖                    | ⊖  | ⊗  | ⊖  | ⊕  | ⊗       |
| Colombo et al. 2021     | ⊕                    | ⊕  | ⊕  | ⊕  | ⊕  | ⊕       |
| Duska et al. 2020*      | ⊖                    | ⊕  | ⊕  | ⊗  | ⊕  | ⊗       |
| Freedman et al. 1989    | ⊕                    | ⊕  | ⊕  | ⊗  | ⊖  | ⊗       |
| Li et al. 2019          | ⊗                    | ⊖  | ⊕  | ⊕  | ⊖  | ⊗       |
| Ramanathan et al. 2014* | ⊖                    | ⊕  | ⊕  | ⊗  | ⊖  | ⊗       |

Domains:  
D1: Bias arising from the randomization process.  
D2: Bias due to deviations from intended intervention.  
D3: Bias due to missing outcome data.  
D4: Bias in measurement of the outcome.  
D5: Bias in selection of the reported result.

Judgement  
⊗ High  
⊖ Some concerns  
⊕ Low

**Figure S1.** Risk of bias assessment of included randomized controlled trials – Individual trial judgements. \* Trials were assessed for safety.

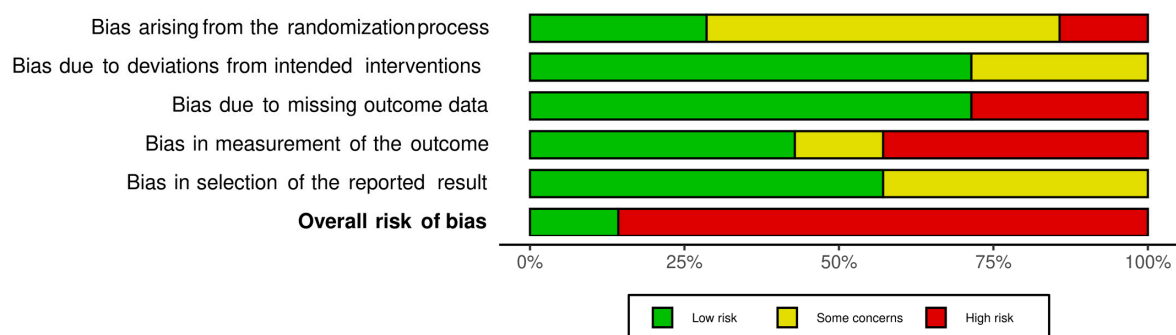

**Figure S2.** Risk of bias assessment of included randomized controlled trials – Collective risk of bias assessments.



| Study                     | Risk of bias |    |    |    |    |    |         |
|---------------------------|--------------|----|----|----|----|----|---------|
|                           | D1           | D2 | D3 | D4 | D5 | D6 | Overall |
| Borysiewicz et al. 1996*  | +            | +  | +  | +  | +  | +  | +       |
| Choi et al. 2020          | +            | +  | +  | +  | +  | +  | +       |
| Chung et al. 2019         | +            | +  | +  | +  | +  | +  | +       |
| Doran et al. 2019         | +            | +  | +  | +  | +  | +  | +       |
| Ferrara et al. 2003       | +            | +  | +  | +  | +  | +  | +       |
| Frenel et al. 2017        | +            | +  | +  | +  | +  | +  | +       |
| Friedman et al. 2020      | +            | +  | +  | +  | +  | +  | +       |
| Frumovitz et al. 2020     | +            | +  | +  | +  | +  | +  | +       |
| Hasan et al. 2020         | +            | +  | +  | +  | +  | +  | +       |
| Hasegawa et al. 2018      | +            | +  | +  | +  | +  | +  | +       |
| Huh et al. 2020           | +            | +  | +  | +  | +  | +  | +       |
| Hui et al. 1997           | +            | +  | +  | +  | +  | +  | +       |
| Jung et al. 2019          | +            | +  | +  | +  | +  | +  | +       |
| Kentler et al. 2008*      | +            | +  | +  | +  | +  | +  | +       |
| Lan et al. 2020           | +            | +  | +  | +  | +  | +  | +       |
| Lhereux et al. 2019       | +            | +  | +  | +  | +  | +  | +       |
| Lu et al. 2017            | +            | +  | +  | +  | +  | +  | +       |
| Maciag et al. 2009        | +            | +  | +  | +  | +  | +  | +       |
| Mayadev et al. 2019       | +            | +  | +  | +  | +  | +  | +       |
| Melief et al. 2020        | +            | +  | +  | +  | +  | +  | +       |
| Nagarsheth et al. 2021    | +            | +  | +  | +  | +  | +  | +       |
| Naumann et al. 2019       | +            | +  | +  | +  | +  | +  | +       |
| O'Malley et al. 2021      | +            | +  | +  | +  | +  | +  | +       |
| Qiao et al. 2019          | +            | +  | +  | +  | +  | +  | +       |
| Rahma et al. 2014         | +            | +  | +  | +  | +  | +  | +       |
| Reuschenbach et al. 2016  | +            | +  | +  | +  | +  | +  | +       |
| Rischin et al. 2020       | +            | +  | +  | +  | +  | +  | +       |
| Santin et al. 2006        | +            | +  | +  | +  | +  | +  | +       |
| Santin et al. 2008        | +            | +  | +  | +  | +  | +  | +       |
| Santin et al. 2020        | +            | +  | +  | +  | +  | +  | +       |
| Steller et al. 1998       | +            | +  | +  | +  | +  | +  | +       |
| Stevanovic et al. 2015    | +            | +  | +  | +  | +  | +  | +       |
| Stevanovic et al. 2019    | +            | +  | +  | +  | +  | +  | +       |
| Strauss et al. 2020       | +            | +  | +  | +  | +  | +  | +       |
| Takeuchi et al. 2020      | +            | +  | +  | +  | +  | +  | +       |
| Tamura et al. 2019        | +            | +  | +  | +  | +  | +  | +       |
| Tinker et al. 2019        | +            | +  | +  | +  | +  | +  | +       |
| Tsuda et al. 2004         | +            | +  | +  | +  | +  | +  | +       |
| Van Driel et al. 1999     | +            | +  | +  | +  | +  | +  | +       |
| Van Poelgeest et al. 2013 | +            | +  | +  | +  | +  | +  | +       |
| Welters et al. 2008*      | +            | +  | +  | +  | +  | +  | +       |
| Welters et al. 2016*      | +            | +  | +  | +  | +  | +  | +       |
| Yin et al. 2020           | +            | +  | +  | +  | +  | +  | +       |
| Youn et al. 2020          | +            | +  | +  | +  | +  | +  | +       |

D1: Confounding  
D2: Classification of Interventions  
D3: Bias due to deviations of intended intervention  
D4: Missing outcome data  
D5: Measurement of outcomes  
D6: Selection of reported results

Judgement  
+ High  
+ Unclear  
+ Low

**Figure S3.** Risk of bias assessment of included single arm cohort trials – Individual trial judgements.  
\* Trials were assessed for safety.

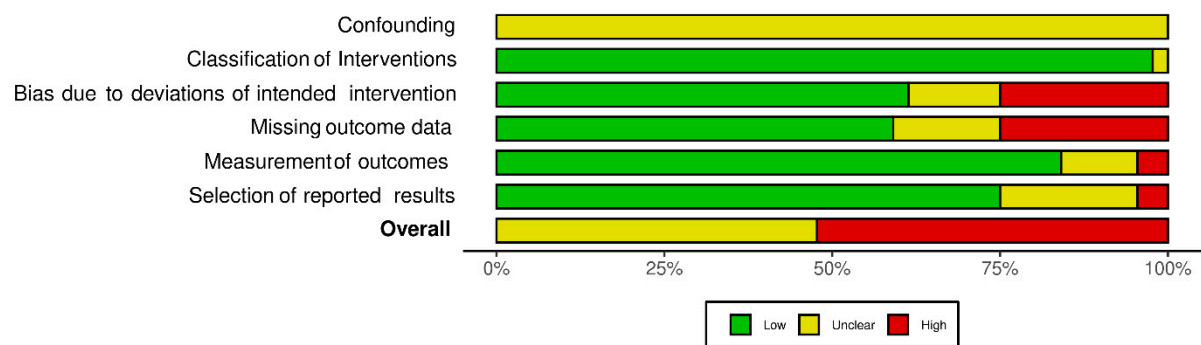

**Figure S4.** Risk of bias assessment of included single arm cohort trials – Collective risk of bias assessments.
